# Supplementary material for: Addressing soil data needs and data gaps in catchment-scale environmental modelling: the European perspective
Source: Copernicus journal article supplement (doi:10.5194/soil-10-587-2024), 2024-09-09
Supplement: Supplementary file 1 [file soil-10-587-2024-supplement.pdf]

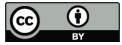

*Supplement of*

## **Addressing soil data needs and data gaps in catchment-scale environmental modelling: the European perspective**

**Brigitta Szabó et al.**

*Correspondence to:* Piroska Kassai ([kassai.piroska@atk.hun-ren.hu](mailto:kassai.piroska@atk.hun-ren.hu))

The copyright of individual parts of the supplement might differ from the article licence.

a)

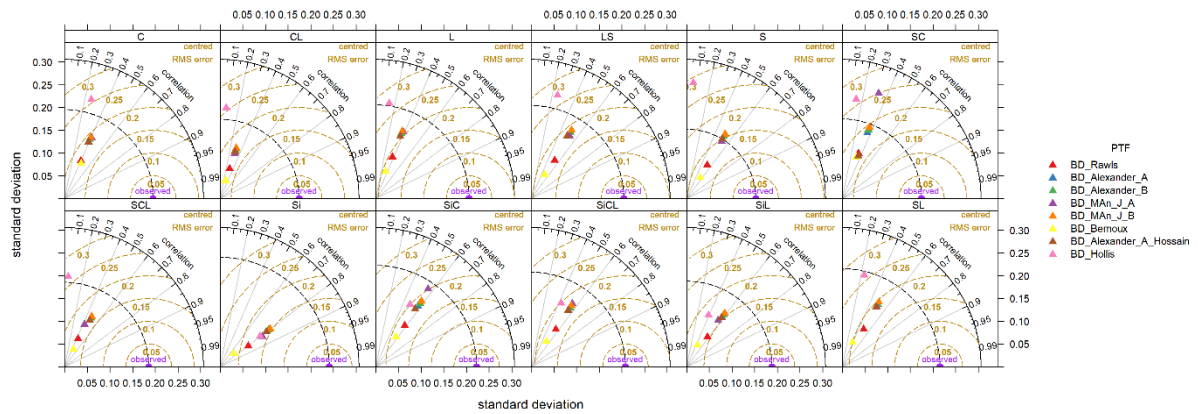

b)

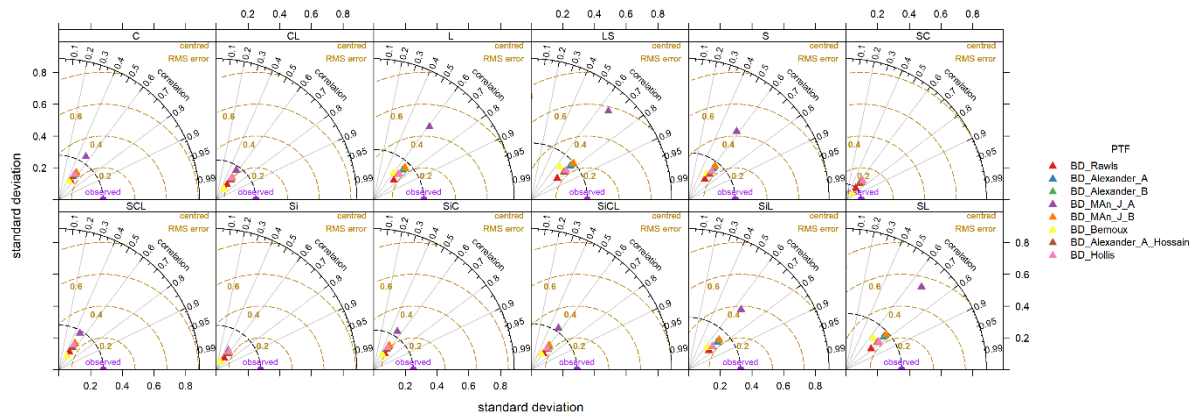

**Figure S1.** Taylor diagram, showing correspondence between the predicted and observed bulk density values by the applied pedotransfer functions, tested on point data in EU-HYDI dataset (N = 11,273) (a) and LUCAS Topsoil dataset (N = 5821) by soil texture classes, in terms of the correlation coefficient, the standard deviation and the centred root-mean-square error.

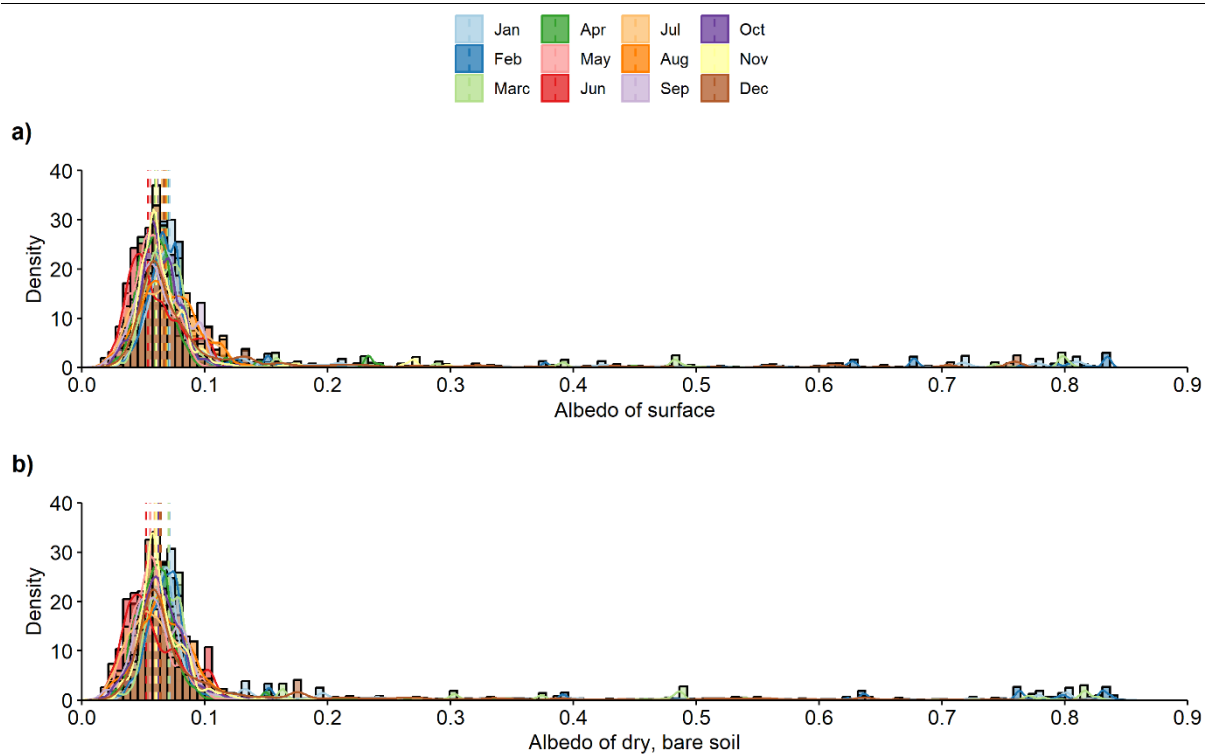

**Figure S2.** Histograms of the monthly surface and dry, bare soil albedo of year 2022 extracted from the MCD43A3 global database for the EU-HYDI topsoil layers (N = 1904). Vertical dashed lines indicate the median values.

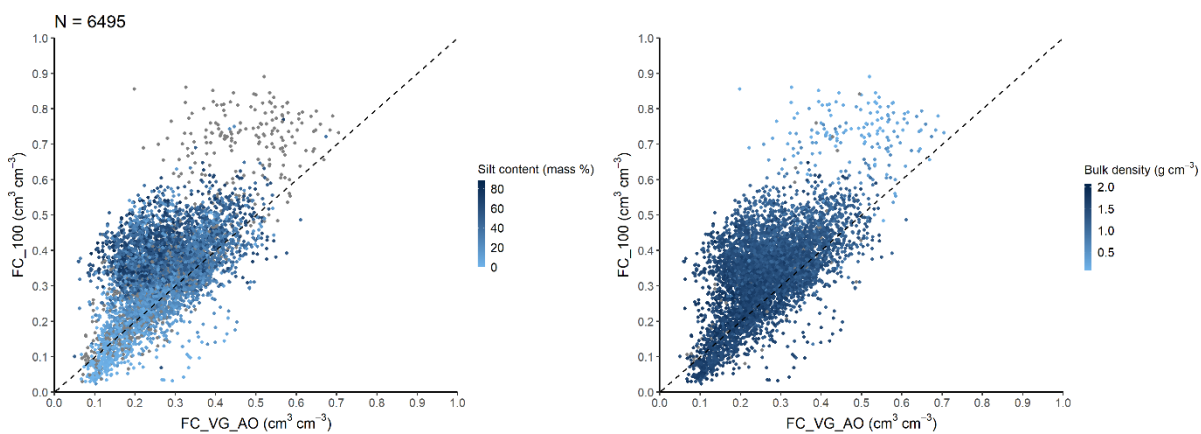

**Figure S3.** Scatterplot of internal drainage dynamics-based field capacity (FC\_VG\_AO) versus field capacity measured at -100 cm head with information on silt content and bulk density.

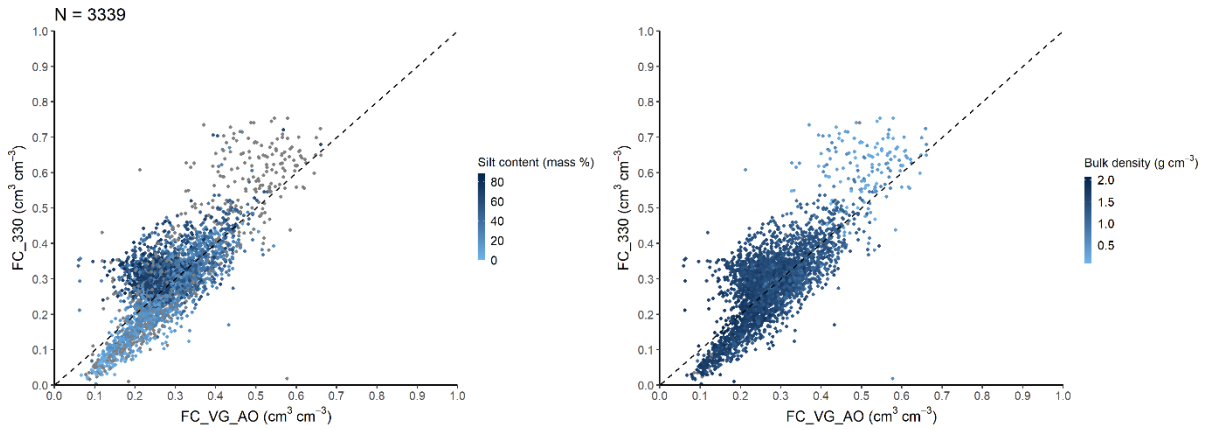

**Figure S4.** Scatterplot of internal drainage dynamics-based field capacity (FC\_VG\_AO) versus field capacity measured at -330 cm head with information on silt content and bulk density.

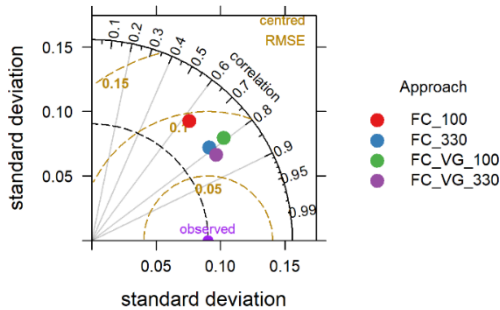

**Figure S5.** Taylor diagram showing correspondence between the differently defined field capacity values and the internal drainage dynamics-based field capacity (observed) values, analysed on the EU-HYDI dataset (N = 2,923), in terms of the correlation coefficient, the standard deviation and the centred root-mean-square error. FC\_100, FC\_330: measured FC at -100 and -330 matric potential, respectively; FC\_VG\_100, FC\_VG\_330: computed FC from the fitted VG model with parameter h (head) set at -100 and -330 cm matric potential, respectively.

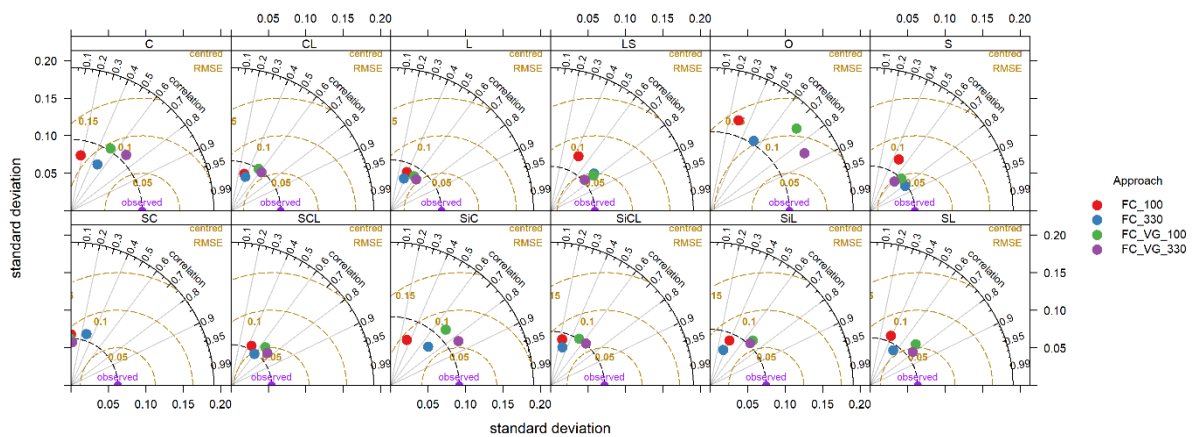

**Figure S6.** Taylor diagram showing correspondence between the internal drainage dynamics-based field capacity (observed) values and the differently defined field capacity values – measured at -100 and -330 matric potential and computed based on VG model with parameter h (head) set at -100 and -330 cm matric potential (FC\_100, FC\_330, FC\_VG\_100, FC\_VG\_330, respectively), tested on point data in EU-HYDI dataset (N = 2,923) by soil texture classes, in terms of the correlation coefficient, the standard deviation and the centred root-mean-square error. C: clays, CL: clay loams, L: loams, LS: loamy sands, O: organic soils, S: sands, SC: sandy clays, SCL: sandy clay loams, SiC: silty clays, SiCL: silty clay loams, SiL: silty loams, SL: sandy loams.

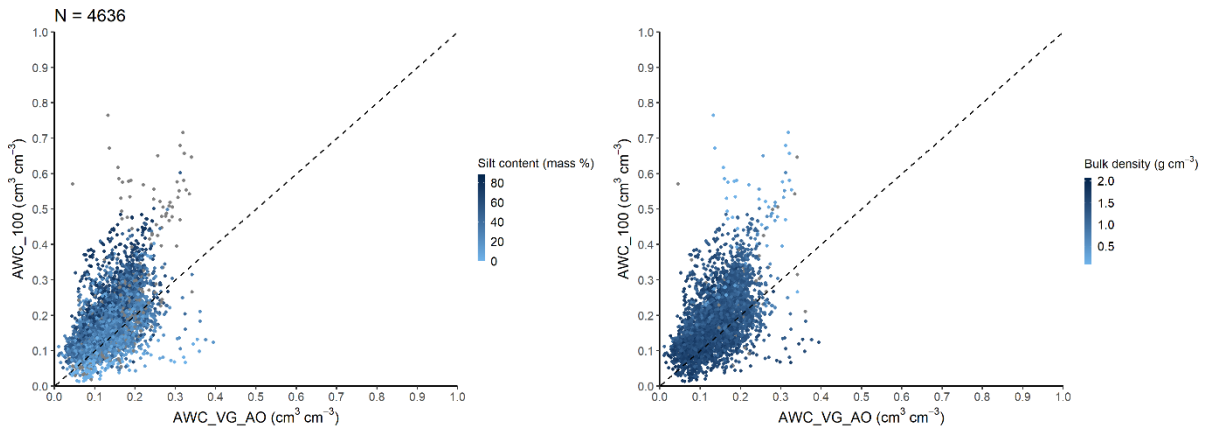

**Figure S7.** Scatterplot of available water capacity based on field capacity measured at -100 cm head and computed from the van Genuchten parameters with information on silt content and bulk density.

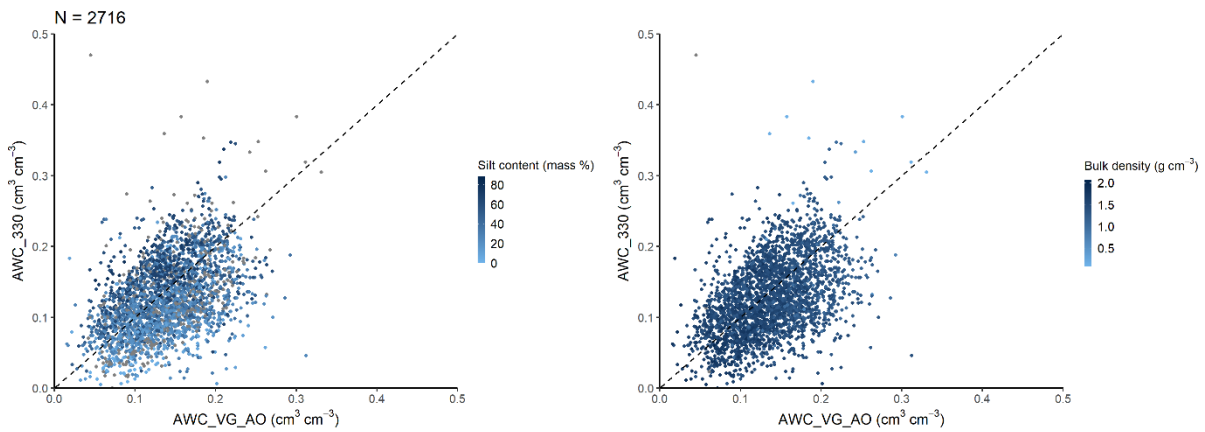

**Figure S8.** Scatterplot of available water capacity based on field capacity measured at -330 cm head and computed from the van Genuchten parameters with information on silt content and bulk density.

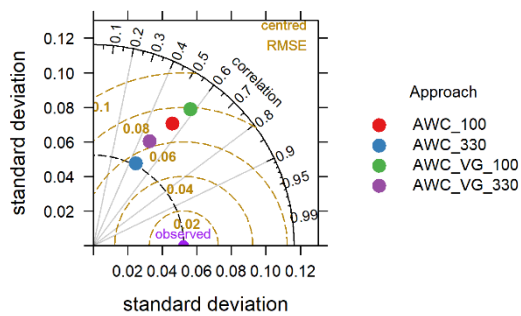

**Figure S9.** Taylor diagram showing correspondence between the available water capacity computed from internal drainage dynamics-based field capacity and wilting point derived based on VG parameters (observed) and differently defined available water capacity values, analysed on the EU-HYDI point dataset, in terms of the correlation coefficient, the standard deviation and the centred root-mean-square error. AWC<sub>100</sub>, AWC<sub>330</sub>: available water capacity computed from measured field capacity at -100 and -330 cm matric potential and wilting point, respectively (N = 4,213, N = 2379); AWC<sub>VG\_100</sub>, AWC<sub>VG\_330</sub>: available water capacity computed from field capacity at -100 and -330 cm matric potential and wilting point based on fitted VG parameters, respectively (N = 6602 for both).

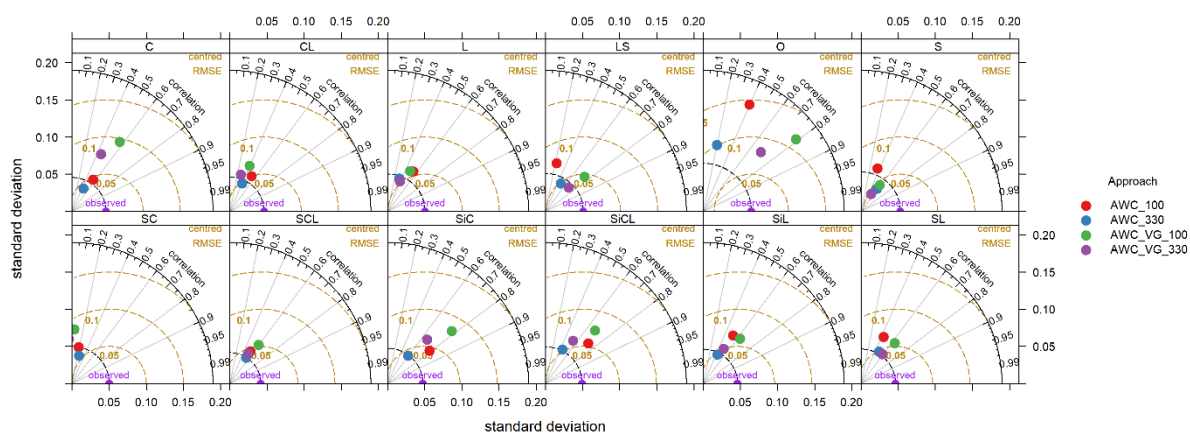

**Figure S10.** Taylor diagram showing correspondence between the differently computed available water capacity values – based on field capacity at -100 and -330 matric potential ( $N = 4,213$ ,  $N = 2379$ ) and computed based on VG model with parameter  $h$  (head) set at -100 and -330 cm matric potential ( $N = 6602$  for both) to compute the field capacity (AWC\_100, AWC\_330, AWC\_VG\_100, AWC\_VG\_330, respectively) – and the internal drainage dynamics-based available water capacity (observed) values, tested on point data in EU-HYDI dataset by soil texture classes, in terms of the correlation coefficient, the standard deviation and the centred root-mean-square error. C: clays, CL: clay loams, L: loams, LS: loamy sands, O: organic soils, S: sands, SC: sandy clays, SCL: sandy clay loams, SiC: silty clays, SiCL: silty clay loams, SiL: silty loams, SL: sandy loams.
